# Supplementary material for: Neutrophil degranulation interconnects over-represented biological processes in atrial fibrillation
Source: PubMed Central journal article supplement (PMC7859227; doi:10.1038/s41598-021-82533-5), 2021-02-03

**Title page**

Neutrophil degranulation interconnects over-represented biological processes in atrial fibrillation

Makiri Kawasaki<sup>†1</sup>, PhD, Eva R. Meulendijks<sup>†1</sup>, MSc, Nicoline W.E. van den Berg<sup>1</sup>, MD, Fransisca A. Nariswari<sup>1</sup>, MSc, Jolien Neefs<sup>1</sup>, MD, Robin Wesselink<sup>1</sup>, MSc, Sarah W.E. Baalman<sup>1</sup>, MD, Aldo Jongejan<sup>2</sup>, PhD, Tim Schelfhorst<sup>3</sup>, BSc, Sander R. Piersma<sup>3</sup>, PhD, Thang V. Pham<sup>3</sup>, PhD, Wim J.P. van Boven<sup>1</sup>, MD, Antoine H.G. Driessen<sup>1</sup>, MD, PhD, Connie R. Jimenez<sup>3</sup>, PhD, Joris R. de Groot<sup>\*1</sup>, MD, PhD.

<sup>1</sup>Amsterdam UMC, University of Amsterdam, Heart Centre; Department of Clinical and Experimental Cardiology, Amsterdam Cardiovascular Sciences, Meibergdreef 9, 1105 AZ, Amsterdam, The Netherlands

<sup>2</sup>Amsterdam UMC, University of Amsterdam, Bioinformatics Laboratory, Department of Clinical Epidemiology, Biostatistics and Bioinformatics, Meibergdreef 9, 1105 AZ, Amsterdam, The Netherlands

<sup>3</sup>Amsterdam UMC, VU University Medical Centre, Cancer Centre Amsterdam, OncoProteomics Laboratory, De Boelelaan 1117, 1081 HV, Amsterdam, The Netherlands

<sup>†</sup>Both authors contributed equally to this study

\*Corresponding author

*Supplementary Table 1. TOP 20 proteins most differentially expressed in the left atrial tissue of AF patients*

The list is sorted by the negative exponent of non-adjusted (non-adj)  $p$ -value (beta-binominal test). *N/A*, not applicable (not detected in non-AF samples). FC, fold-change. *NS*, not significant. (i/m)Q, Benjamini-Hochberg critical value.

*Supplementary Figure 1. The image of the gel stained with Coomassie brilliant blue*

The image of the gel after one-dimensional electrophoresis were fixated and stained with Coomassie brilliant blue overnight. L, ladder. F1-5, fraction 1-5. The dotted lines indicate the cutting line.

*Supplementary Figure 2. Principal component analysis*

**(a)** The result of principal component analysis (PCA) is shown in the dimension of PC1 (accounts for 28.6% of variance) and PC2 (24%). The blue and red dots represent non-AF patients (#1-3) and persistent AF patients (#4-6), respectively. **(b)** The distance between each patient is shown in a hierarchical unsupervised clustering. PCA was performed on R software<sup>54</sup> (version 3.5.3).

*Supplementary Figure 3. The result of GSEA analysis*

The nodes represent significantly up-regulated **(a-f)** and down-regulated gene-sets **(g)** in AF (FDR-adjusted  $p$ -value<0.1). Each node size represents the number of proteins annotated in it, and the edge connects two gene-sets that share >40% components. The nodes with the biggest size among the cluster (a collection of nodes) are named (*italic lettering*). Since *Oxidative phosphorylation* and *carboxylic acid catabolic process* belong to the same branch of *cellular metabolic process*, they were grouped together in **(b)**. Cellular component disassembly and mitochondrial translation share >40% components and therefore grouped together in **(c)**.

*Supplementary Figure 4. The small-scale PPI of the leading edge in the up-regulated gene-sets in AF*

**(a, b)** The PPI of each leading edge and their expression profile that were derived from *Cellular component disassembly* **(a)** and *Ion channel transport* and *Monovalent inorganic cation homeostasis* **(b)**. Among each gene-set, functionally grouped proteins are encircled with its corresponding *GO terms*. Small-scale PPI of *Response to oxidative stress* **(c)** and *Bicarbonate transport* **(d)** that are arisen from the leading edge in *neutrophil degranulation* and *oxidative phosphorylation*. Only the proteins with non-adjusted  $p$ -value<0.1 are displayed here. The color of the nodes and the edges represent the non-adjusted  $p$ -value (0-0.1) and the STRING combined score (0.4-1),

respectively. The color scale of expression represents the z-score of normalized spectral counts of each protein (shown as its *gene name* in each heatmap). The heatmaps were generated using R software<sup>54</sup> (version 3.5.3).

Supplementary Figure 5. Full-length blots

**(a)** Full-length blots of the membrane immunoblotted with anti-Calnexin antibody (internal control) and anti-CAIII antibody. The right and left image are from the same membrane exposed for 90 seconds and 12 minutes, respectively. **(b)** Full-length blots of the membrane immunoblotted with anti-Calnexin antibody and anti-MYH10 antibody.

Supplementary Table 1.

| Gene     | MW<br>(kDa) | Sequence<br>coverage (%) | Normalized spectral counts |      |       |      |      |      | FC   | -Log <sub>10</sub> (p-value)<br>(non-adj) | -Log <sub>10</sub> [(i/m)Q]<br>(FDR=0.25) | Significance |
|----------|-------------|--------------------------|----------------------------|------|-------|------|------|------|------|-------------------------------------------|-------------------------------------------|--------------|
|          |             |                          | Non-AF                     |      |       | AF   |      |      |      |                                           |                                           |              |
|          |             |                          | #1                         | #2   | #3    | #4   | #5   | #6   |      |                                           |                                           |              |
| MPO      | 73.9        | 42.9                     | 4.8                        | 2.9  | 4.0   | 38.5 | 42.2 | 27.2 | 9.2  | 4.2                                       | 4.1                                       | Significance |
| CA3      | 29.6        | 70                       | 0                          | 0    | 0     | 4.2  | 3.9  | 2.1  | N/A  | 3.0                                       | 3.8                                       | NS           |
| LTF      | 78.2        | 68.7                     | 6.7                        | 3.9  | 5.0   | 79.1 | 66.7 | 29.3 | 11.2 | 2.8                                       | 3.6                                       | NS           |
| CTSG     | 28.8        | 54.9                     | 1.9                        | 1.0  | 1.0   | 11.4 | 10.8 | 5.2  | 7.1  | 2.7                                       | 3.5                                       | NS           |
| COMTD1   | 28.8        | 16                       | 0                          | 0    | 0     | 2.1  | 3.9  | 2.1  | N/A  | 2.7                                       | 3.4                                       | NS           |
| HIST1H1B | 22.6        | 35.4                     | 1.9                        | 1.0  | 0     | 5.2  | 7.9  | 6.3  | 6.7  | 2.6                                       | 3.3                                       | NS           |
| ELANE    | 28.5        | 25.5                     | 0                          | 0    | 0     | 2.1  | 6.9  | 2.1  | N/A  | 2.4                                       | 3.3                                       | NS           |
| METTL7A  | 28.3        | 22.1                     | 0                          | 0    | 0     | 2.1  | 2.0  | 2.1  | N/A  | 2.3                                       | 3.2                                       | NS           |
| TIMM50   | 39.6        | 28                       | 1.0                        | 1.0  | 0     | 3.1  | 4.9  | 6.3  | 7.4  | 2.3                                       | 3.1                                       | NS           |
| NDUFA9   | 42.5        | 39.8                     | 4.8                        | 9.6  | 9.1   | 18.7 | 17.7 | 16.7 | 2.3  | 2.3                                       | 3.1                                       | NS           |
| MYH10    | 229.0       | 47.7                     | 122.9                      | 80.9 | 125.1 | 56.2 | 73.6 | 72.2 | -1.6 | 2.3                                       | 3.1                                       | NS           |
| EGLN1    | 43.7        | 11.9                     | 0                          | 0    | 0     | 3.1  | 1.0  | 2.1  | N/A  | 2.2                                       | 3.0                                       | NS           |
| PGD      | 51.9        | 55.5                     | 6.7                        | 3.9  | 3.0   | 10.4 | 13.7 | 13.6 | 2.8  | 2.2                                       | 3.0                                       | NS           |
| LCN2     | 22.5        | 47                       | 1.0                        | 0.0  | 0.0   | 5.2  | 3.9  | 2.1  | 11.7 | 2.2                                       | 3.0                                       | NS           |
| NCAM1    | 80.3        | 27.3                     | 25.0                       | 23.1 | 20.2  | 16.6 | 9.8  | 15.7 | -1.6 | 2.2                                       | 2.9                                       | NS           |
| NDRG2    | 40.8        | 52                       | 7.7                        | 6.7  | 6.1   | 16.6 | 13.7 | 15.7 | 2.3  | 2.2                                       | 2.9                                       | NS           |
| FDXR     | 52.9        | 32.7                     | 0                          | 3.9  | 4.0   | 9.4  | 6.9  | 10.5 | 3.4  | 2.1                                       | 2.9                                       | NS           |
| CAND1    | 136.4       | 35.2                     | 15.4                       | 12.5 | 13.1  | 10.4 | 5.9  | 5.2  | -1.9 | 2.1                                       | 2.8                                       | NS           |
| NDUFS2   | 51.9        | 45.1                     | 25.0                       | 37.5 | 32.3  | 51.0 | 54.0 | 49.1 | 1.6  | 2.1                                       | 2.8                                       | NS           |
| CA4      | 35.0        | 22.1                     | 0                          | 0    | 1.0   | 3.1  | 4.9  | 2.1  | 10.0 | 2.0                                       | 2.8                                       | NS           |

Supplementary Figure 1.

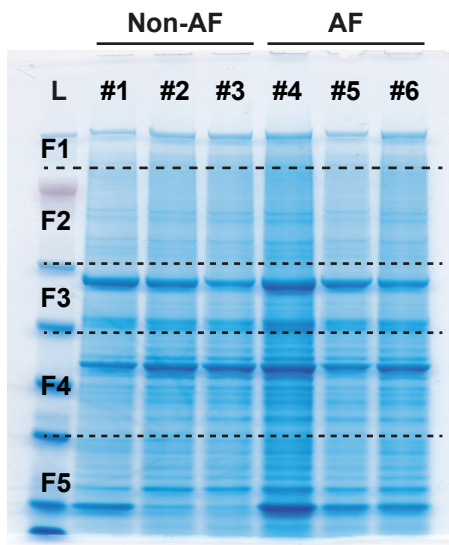

Supplementary Figure 2.

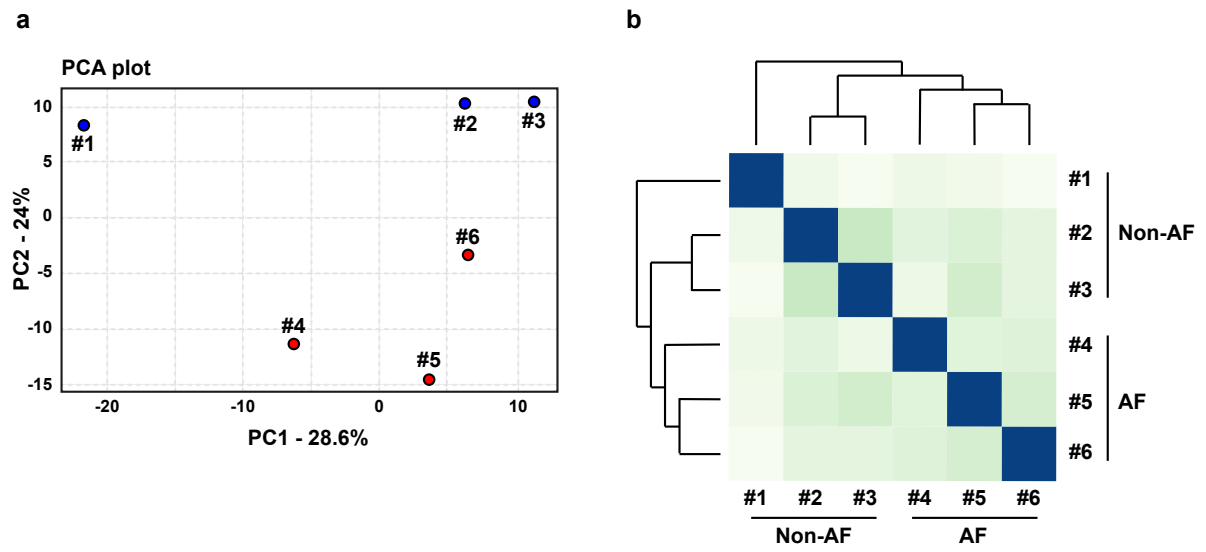

Supplementary Figure 3.

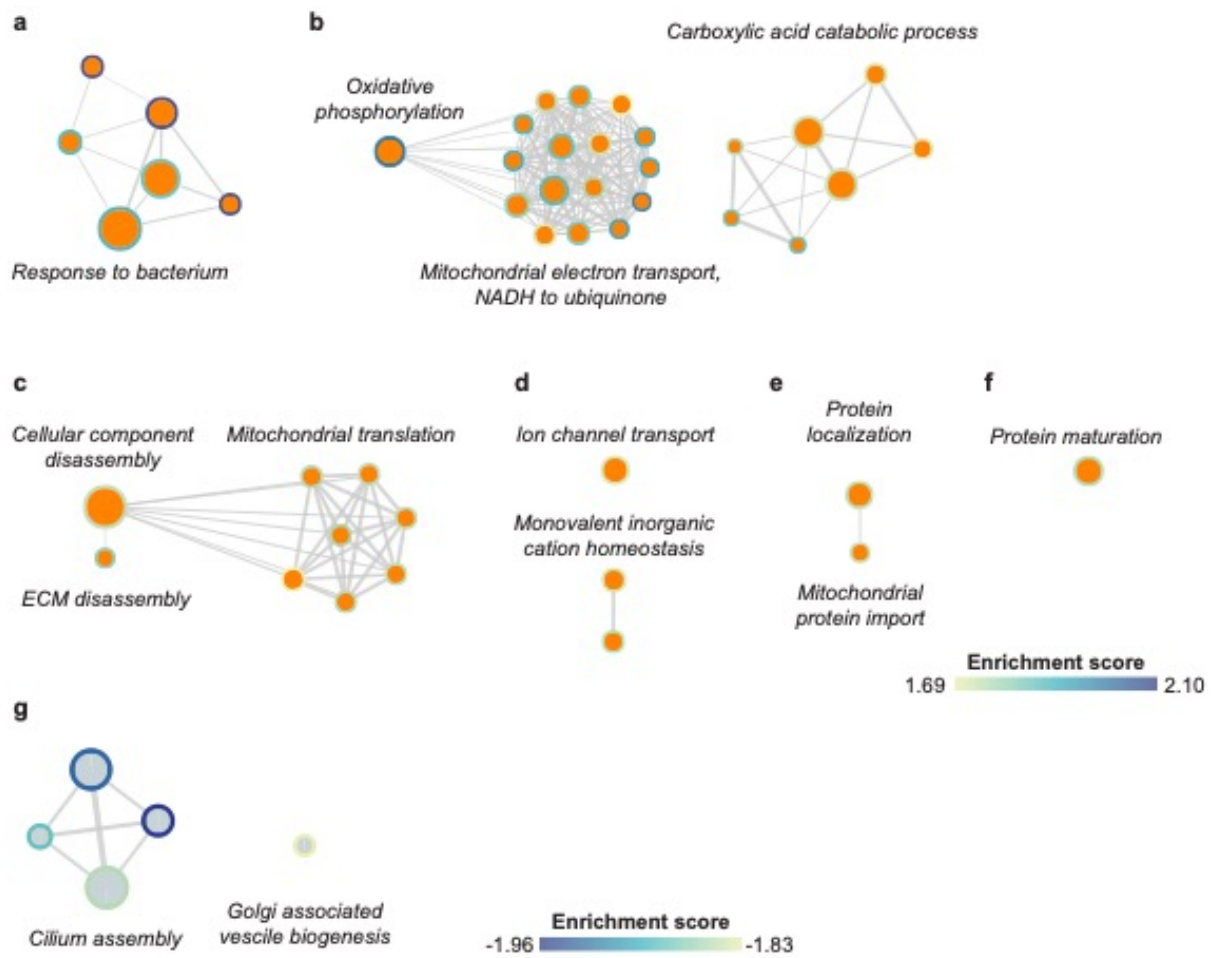

Supplementary Figure 4.

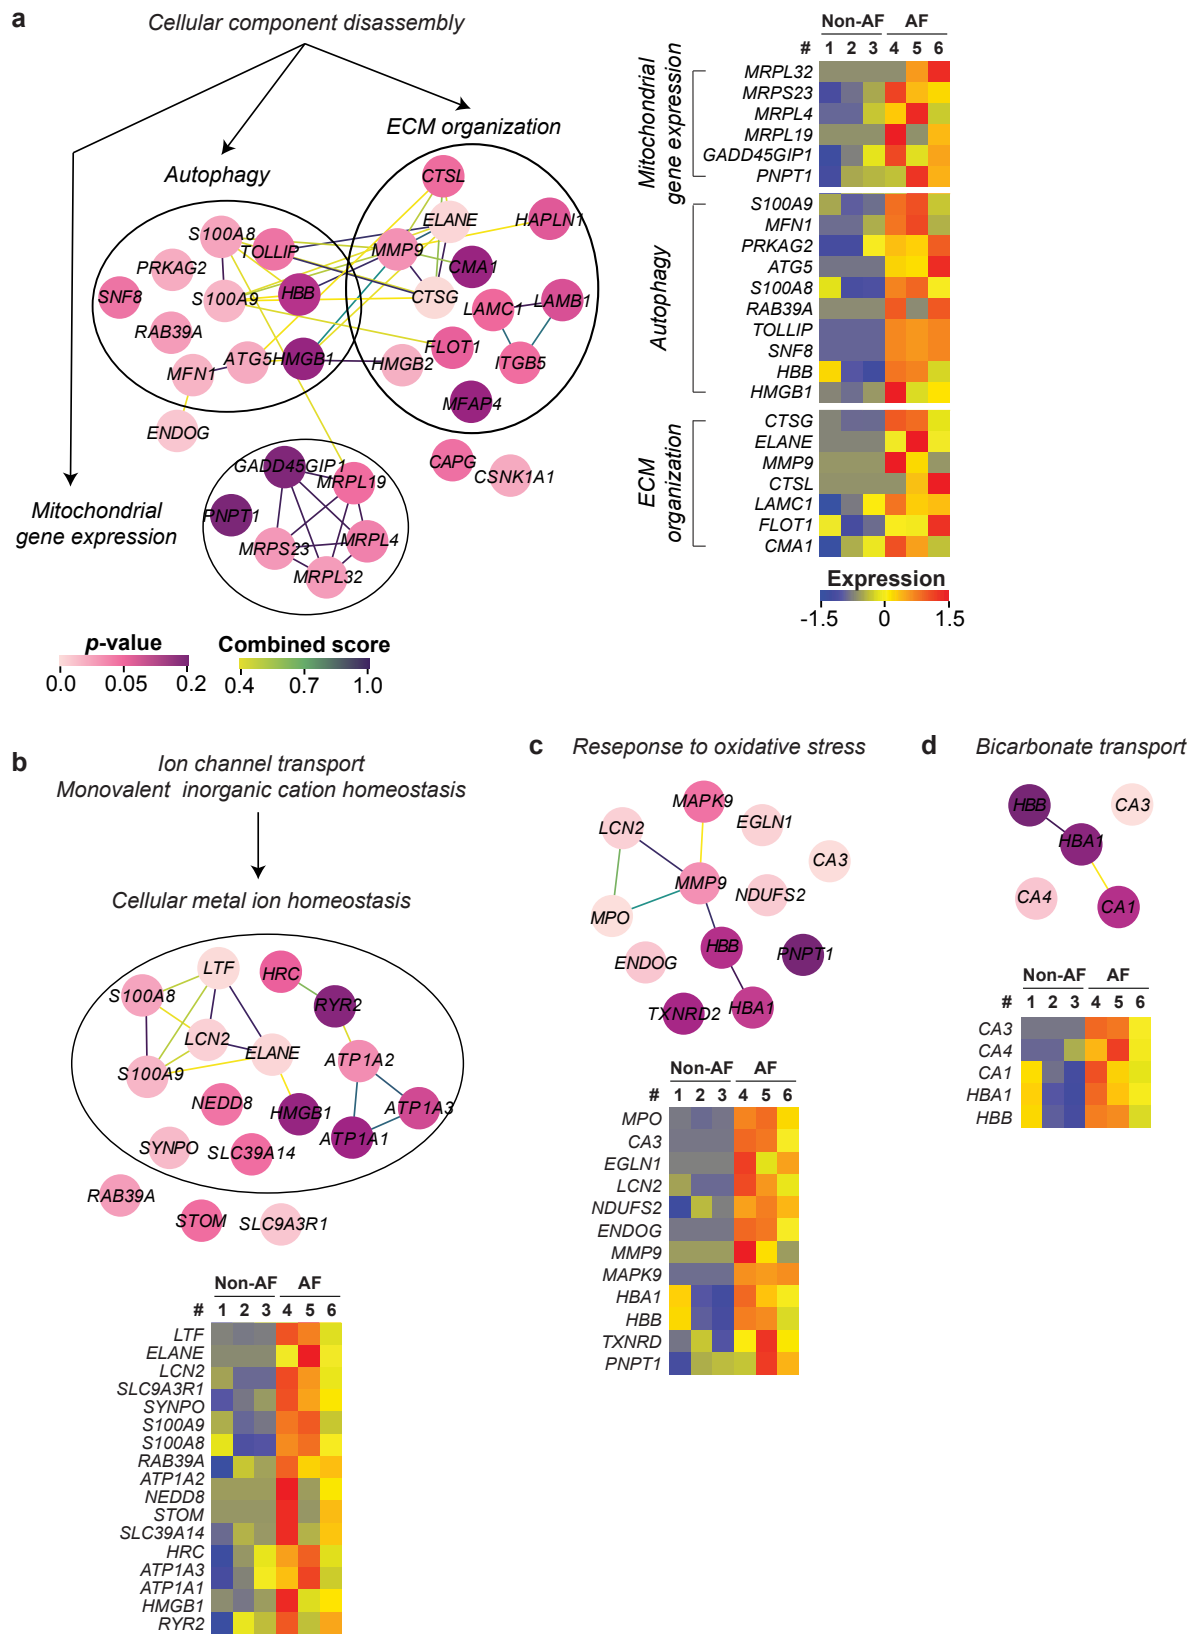



Supplementary Figure 5.

**a**

Exposure time: 90 sec

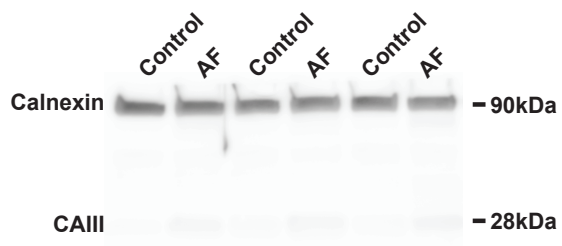

Exposure time: 12 min

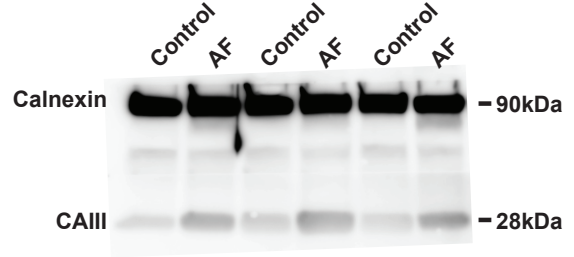

**b**

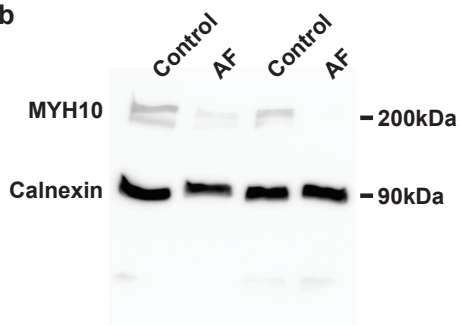

Supplement: 41598_2021_82533_MOESM1_ESM.pdf [file 41598_2021_82533_MOESM1_ESM.pdf]
